# Supplementary material for: Correction of stratospheric age of air (AoA) derived from sulfur hexafluoride (SF 6 ) for the effect of chemical sinks
Source: Copernicus journal article supplement (doi:10.5194/acp-24-4193-2024), 2024-04-09
Supplement: Supplementary file 1 [file acp-24-4193-2024-supplement.zip]

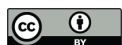

## *Supplement of*

# **Correction of stratospheric age of air (AoA) derived from sulfur hexafluoride (SF<sub>6</sub>) for the effect of chemical sinks**

**Hella Garny et al.**

*Correspondence to:* Hella Garny (hella.garny@dlr.de)

- acp-24-4193-2024-supplement-title-page.pdf
- README.txt
- SF6\_AoA\_EMAC\_Jan2000.nc
- SF6\_reference.nc
- sf6\_correction\_EXAMPLE.py
- sf6sinkcorr.py

The copyright of individual parts of the supplement might differ from the article licence.
